# Supplementary material for: Preparation of electrochemical aptamer-based sensors: a direct aryl diazonium grafting approach
Source: Royal Society of Chemistry journal article supplement (doi:10.1039/d5cc00857c), 2025-01-01
Supplement: d5cc00857c1.pdf [file d5cc00857c1.pdf]

## Preparation of Electrochemical Aptamer-based Sensors: A direct Aryl Diazonium Grafting Approach

Essam M. Dief<sup>1</sup>, Wenxian Tang<sup>1</sup>, Liam R. Carroll<sup>1</sup>, Tony Breton<sup>2\*</sup>, and J. Justin Gooding<sup>1\*</sup>

3

<sup>4</sup>School of Chemistry and Australian Centre for NanoMedicine, University of New South Wales, Sydney, New South Wales, Australia.

<sup>6</sup>CNRS, MOLTECH-Anjou, SFR MATRIX, Université Angers, F-49000 Angers, France.

<sup>7</sup>Corresponding authors: Breton, T. (tony.breton@univ-angers.fr), and Gooding, J. J.

<sup>8</sup>justin.gooding@unsw.edu.au).

9

10

11

12

13

14

15

16

17

18

19

20

21

22

23

24

25

26

27

28

29

30

31

32

33

### 3 RESULTS SECTIONS

35

36

37

38

39

40

41

42

43

44

45

46

47

48

49

50

51

52

53

54

55

56

57

58

59

60

61

62

63

64

65

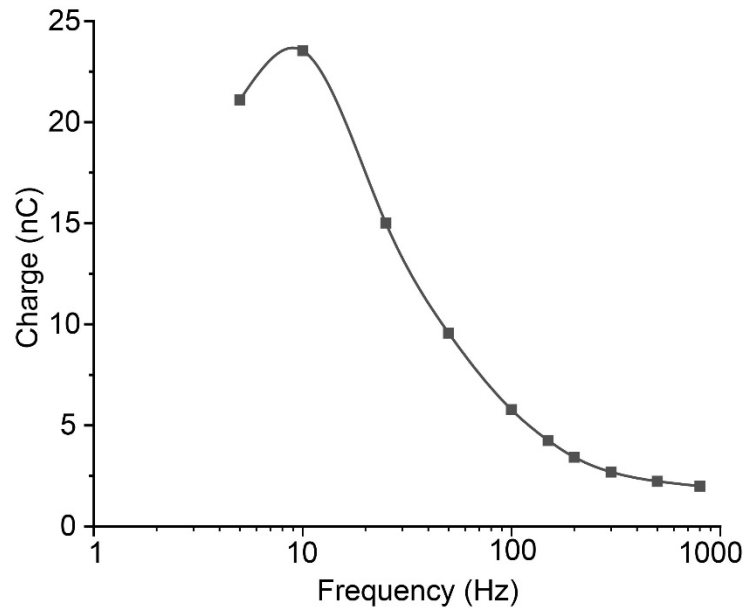

**Figure S1.** Charge-frequency plot for the thiol-gold enabled aptamer sensor.

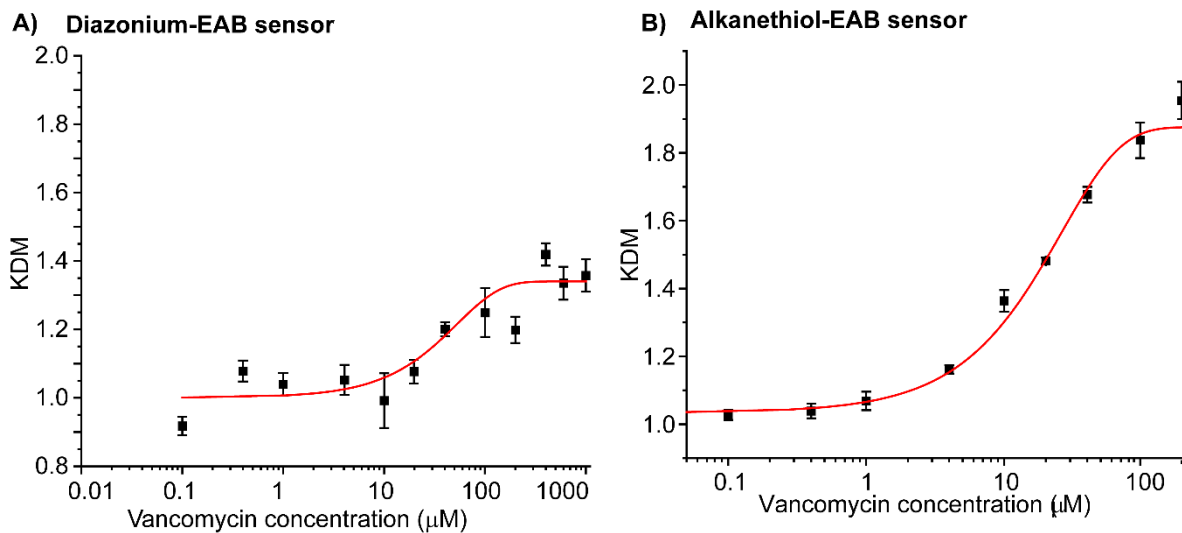

**Figure S2.** Calibration curves for vancomycin EAB sensors made using the diazonium chemistry approach (A) and the conventional alkanethiol approach (B) showing the sensor obtained using the aryldiazonium approach follows a logarithmic signal increase pattern.

66

67

68

69

70

71

72

73

74

75

76

77

78

79

80

81

82

83

84

85

86

## 87 EXPERIMENTAL SECTION

### 88 Chemical reagents and Materials

89 All chemicals were purchased of high-purity grades. Sodium hydroxide (NaOH)  $\geq 98\%$ , pellets (anhydrous),  
90 sulfuric acid 98% and sodium nitrite 99.999% and hydrochloric acid (HCl) ACS reagent, 37% and magnesium  
91 chloride hexahydrate were supplied from Sigma-Aldrich. Milli-Q<sup>®</sup> was used to prepare all the aqueous  
92 solutions. Gold wires (0.25 mm diameter),  $>99.999\%$ , were purchased from Goodfellow (UK). Leakless  
93 Ag/AgCl (3 M KCl) reference electrodes and platinum counter electrodes were purchased from CH  
94 Instruments. Phosphate buffered saline (PBS) was obtained from ThermoFisher Scientific (Australia) and  
95 used after adding 2 mM  $\text{MgCl}_2$  to mimic the concentration of magnesium in blood. An oligonucleotide with  
96 4-aminobenzoic acid (4-ABA) functional group at the 5' end and a methylene blue moiety at the 3' end was  
97 acquired from Eurogentec (Liège, Belgium). The DNA sequence in this work (Table S1) was designed to target  
98 the antibiotic vancomycin. Miniature heat-shrink tubing was bought from McMaster-Carr, Illinois, USA.

#### 99 **Table S1. Sequence and functional groups of the aptamer used.**

100 -4-ABA-O-PO<sub>2</sub>O-GCGAGGGTACCGCTTAAAGTGGGTCCGC-O-CH<sub>2</sub>-CH(CH<sub>2</sub> OH) -NH-C(O)-(CH<sub>2</sub>)<sub>2</sub>-MB-3'

101

### 102 **Gold electrode cleaning/treatment before functionalisation**

103 The Au wires were cut into 6 cm long electrodes that were then covered with a 4.5 cm long miniature heat  
104 shrink tubing with 0.5 cm of the Au wire is kept bare at one end and used as the working electrode area. The  
105 gold wire electrode working area was electrochemically cleaned by successive cycling voltammetry scanning  
106 from  $-1$  to  $-1.6$  V in 0.5 M NaOH for 200 cycles at a scan rate of 1 V/S. The NaOH scanning was then followed  
107 by another cleaning step by voltammetry cycling in 0.5 M sulfuric acid for 30 cycles between  $-0.2$  V and  $+1.6$   
108 V at a scan rate of 0.1 V/S. The gold wires were then washed with Milli-Q water before immersion in the DNA  
109 containing solution.

108

109

110

### 11 **Gold electrode functionalisation via in situ diazotisation of arylamine-terminated aptamers.**

11 The aptamer grafting solution was prepared from a 0.7 mM  $\text{MgCl}_2$ /1xPBS buffer. The gold wire electrodes  
11 were immersed in 1  $\mu\text{M}$  solution of 4-aminobenzoic acid terminated aptamer for 1 hour at  $^\circ\text{C}$  (note: the 4-  
11 ABA group is located at the 5' end and connected to the aptamer nucleobases via an amide bond, while the  
11 methylene blue moiety is located at the 3' end of the aptamer). After the aptamer attachment step, the gold  
11 electrodes were immersed in 5 mM solution of 6-mercapto-1-hexanol (MCH) in 0.7  $\text{MgCl}_2$ /1xPBS buffer for  
11 3 hours. For the alkanethiol terminated aptamer EAB sensors, the clean Au wires were incubated in the S-S-  
11 terminated aptamer solution, that was submitted to TCEP (1 mM) for 1 h in dark, for 1 hour, before  
11 immersing the electrode in 5 mM MCH for 3 hours.

120

### 12 **Electrochemical measurements and data analysis**

12 All fabricated sensors were electrochemically interrogated using square wave voltammetry (SWV) using  
12 Multichannel Autolab potentiostat (Metrohm). Electrochemical measurements were carried out using a  
12 three-electrode electrochemical cell system with Ag/AgCl as the reference electrode, Pt wire as the counter  
12 electrode and the DNA functionalised gold wire as the working electrode.<sup>1</sup> Data analysis was performed using  
12 home-built Matlab code that fitted the square wave voltammetry peaks, extracted the absolute peak  
12 currents and charges, normalised current values and calculated KDMs values. SWV was measured from -0.45  
12 V to -0.05 (versus Ag/AgCl) with an amplitude of 25 mV in PBS buffer containing 0.7 mM  $\text{MgCl}_2$  (pH = 7.4) at  
12 28  $^\circ\text{C}$ . The sensors were left in the measurement buffer (at 28  $^\circ\text{C}$ ) for 5 minutes before SWV recording to  
13 allow for the temperature to equilibrate. Different concentrations of vancomycin were spiked in the  
13 measurement buffer followed by 3-5 minutes of stirring before SWV recording.

13 The working area of the gold electrode was controlled via limiting the physical working area of the gold wire  
13 to 0.5 cm long and the effective working area of these electrodes was controlled by applying a two-step  
13 electrochemical cleaning process by first scanning the electrodes in NaOH (0.5 M) for 200 cycles followed by

135 cleaning in sulfuric acid (0.5 M) for 30 cycles. Integrating the reduction peaks in the cyclic voltammograms  
136 of the bare gold electrodes in H<sub>2</sub>SO<sub>4</sub> shows that the variation in the effective surface area of the different  
137 gold electrodes used in the experiment is insignificant. The effective working area of the sensing layer was  
138 measured by integrating the reduction peak of the electrochemical cleaning cyclic voltammetry signal of the  
139 gold wire in sulfuric acid (0.5 M) as shown in Figure 1b. We have allowed the formation of a single monolayer  
140 of oxygen on the bare gold electrode by voltametric scanning from -0.1 to +1.6 V (vs. Ag/AgCl) in 0.5 M  
141 sulfuric acid, followed by reducing that monolayer by scanning back from +1.6 V to -0.1 V (Figure S3A). We  
142 then integrated the area under the reduction peak to calculate the charge (Figure S3) and that charge was  
143 divided by 400 mC cm<sup>-2</sup>, which corresponds to the charge density of an oxygen monolayer on gold (equation  
144).

$$145 \quad A_{\text{eff}} = Q/q_{\text{red}} \quad \text{equation S1}$$

146 where  $A_{\text{eff}}$  = Effective surface area (cm<sup>2</sup>) of the gold electrode, Q = Charge from the gold oxide reduction  
147 peak (Coulombs) calculated by integrating the reduction peak in cyclic voltammogram of the gold electrode  
148 cleaning in H<sub>2</sub>SO<sub>4</sub> (Figure S3A), and  $q_{\text{red}}$  = Theoretical Charge density for the gold oxide reduction  
149 = 400 μC/cm<sup>2</sup> or 0.0004 C/cm<sup>2</sup>). Figure S3C shows calculated effective surface area of five different gold  
150 electrodes with the effective surface area variation within ±10% suggesting with minimum variations from  
151 electrode to electrode. Error bars represent the standard deviations of the area calculated from reduction  
152 peak last five cyclic voltammograms of the H<sub>2</sub>SO<sub>4</sub> electrochemical cleaning

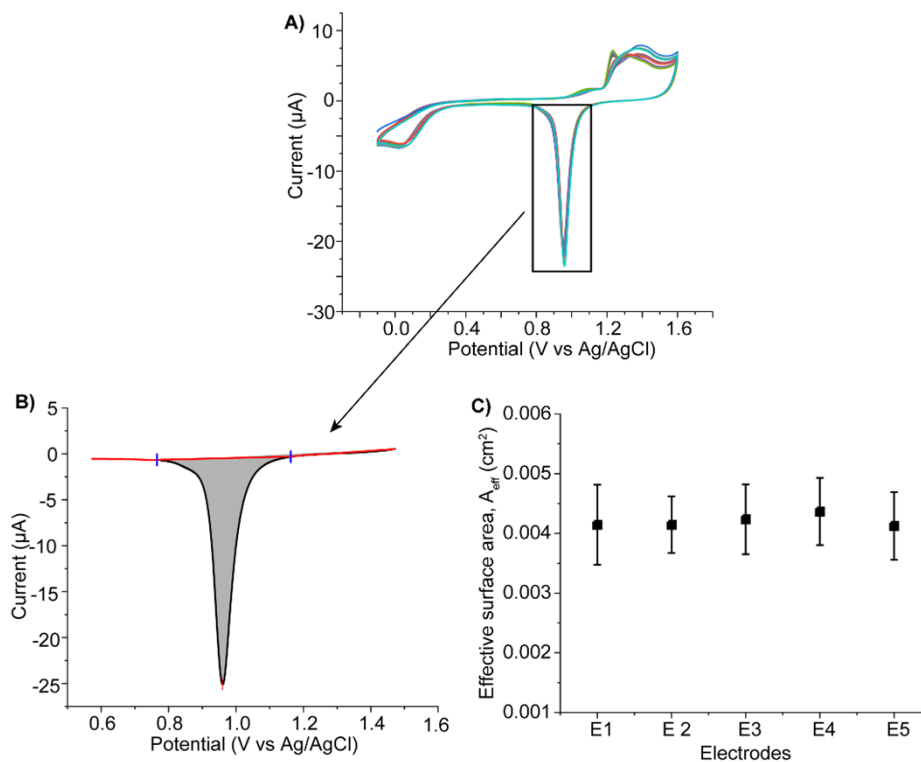

**Figure S3.** Cyclic voltammetry of different four gold electrodes in that were cleaned in  $\text{H}_2\text{SO}_4$  (0.5 M) for 30 cycles between  $-0.1$  V and  $+1.6$  V (vs Ag/AgCl). Note, here we put only the last 5 cycles of every cleaning to avoid data overlay. Data shows that the variation of reduction peak area/current is minimum between the different gold electrodes. B) Reduction peak integration that was used to calculate the charge and thus the effective surface area of the different gold electrodes. C) Charge of the different clean gold electrodes obtained by integrating the reduction peaks of the  $\text{H}_2\text{SO}_4$  cleaning, showing the variations between the different electrode's charges/effective area is minimum ( $\sim 10\%$ ) between the different electrodes. Note, error bars in Figure S2C represent the standard deviation of the last five cyclic voltammograms of the cleaning process.

154

155

156or SWV data analysis, the peak currents were extracted for the different target concentrations at the  
 157different interrogation frequencies. The voltametric peak currents were then converted to normalised signal  
 158change by calculating the difference between the current at certain vancomycin concentration and the  
 159current in the absence of vancomycin (Equation S1).

160

$$161 \text{ Normalised signal} = \frac{I(\text{target}) - I(\text{blank})}{I(\text{blank})} \quad (\text{equation S2})$$

162 Then KDM was calculated by measuring the normalised signal difference at two frequencies (One high  
163 frequency where the sensor has a signal-on and one low frequency where the sensor has a signal-off) for  
164 each target concentration, see equation S2.

165

$$KDM (\%) = \frac{\text{Normalised signal at high frequency} - \text{Normalised signal at low frequency}}{1 + \left( \frac{\text{Normalised signal at high frequency} - \text{Normalised signal at low frequency}}{2} \right)} \times 100$$

166  
167 (equation S3)

168

169

## 170 **References**

171

172 1. R. Lao, S. Song, H. Wu, L. Wang, Z. Zhang, L. He and C. Fan, *Anal. Chem.*, 2005, **77**, 6475-  
173 6480.

174
